# Supplementary material
Source: MDPI journal article supplement (https://www.mdpi.com/1996-1073/14/16/5031)
Supplement: s1 [file s1]

## Supplementary Material

# The Effect of Ammonia Toxicity on Methane Production of a Full-Scale Biogas Plant—An Estimation Method

Sotirios D. Kalamaras <sup>1</sup>, Georgios Vitoulis <sup>1</sup>, Maria Lida Christou <sup>1</sup>, Themistoklis Sfetsas <sup>2</sup>, Spiridon Tziakas <sup>3</sup>, Vassilios Fragos <sup>1</sup>, Petros Samaras <sup>4</sup> and Thomas A. Kotsopoulos <sup>1,\*</sup>

<sup>1</sup> Laboratory of Agricultural Structures & Equipment, Department of Hydraulics, Soil Science and Agricultural Engineering, School of Agriculture, Aristotle University of Thessaloniki, GR-54124 Thessaloniki, Greece; skalamaras@agro.auth.gr (S.D.K.); giorgos\_1914@hotmail.com (G.V.); christoum@agro.auth.gr (M.L.C.); fragos@agro.auth.gr (V.F.)

<sup>2</sup> Research, Analytical & Quality Control Laboratory, QLAB Private Company, GR-57008 Thessaloniki, Greece; tsfetsas@q-lab.gr

<sup>3</sup> Biogas Lagada S.A. Biogas Plant, Organic Waste Treatment & Electricity Generation, Plot 677 Kolchikou, GR-57200 Kolchiko Lagada, Greece; stzi@ergoplaning.gr

<sup>4</sup> Department of Food Science and Technology, School of Geotechnical Sciences, International Hellenic University, GR-57400 Thessaloniki, Greece; samaras@ihu.gr

\* Correspondence: mkotsop@agro.auth.gr; Tel.: +30-231-099-1796

**Table S1.** Volatile Fatty Acids (VFAs) concentrations at the end of BMP tests of the diluted with water (1:1 volume ratio) and undiluted biogas plant's effluent from the 1st period.

| Volatile Fatty Acid-VFA | Effluent diluted with water | Undiluted Effluent |
|-------------------------|-----------------------------|--------------------|
| Acetic acid (mM)        | 0.40242 ± 0.19035           | 1.05935 ± 0.35627  |
| Propionic acid (mM)     | 0.08098                     | ND                 |
| Isobutyric acid (mM)    | ND                          | ND                 |
| Butyric acid (mM)       | ND                          | ND                 |
| Isovaleric acid (mM)    | ND                          | 0.00897            |
| n-Valeric acid (mM)     | ND                          | ND                 |
| Isocaproic acid (mM)    | 0.01792 ± 0.00674           | 0.02243 ± 0.00275  |
| n-Caproic acid (mM)     | ND                          | ND                 |
| Heptanoic acid (mM)     | 0.01203                     | 0.00553            |

ND: Not Detected.

**Table S2.** Descriptive statistics for the co-digestion BMP tests and for the duration of 1 HRT (30 days). Methane potential is expressed as mLCH<sub>4</sub> g<sup>-1</sup> VS added.

| mLCH <sub>4</sub> g <sup>-1</sup> VS added |    |          |                |            |                             |             |         |         |
|--------------------------------------------|----|----------|----------------|------------|-----------------------------|-------------|---------|---------|
| Treatment                                  | N  | Mean     | Std. Deviation | Std. Error | 95% Confidence Interval for |             | Minimum | Maximum |
|                                            |    |          |                |            | Mean                        |             |         |         |
|                                            |    |          |                |            | Lower Bound                 | Upper Bound |         |         |
| 2N                                         | 2  | 330.6760 | 10.83424       | 7.66097    | 233.3342                    | 428.0178    | 323.02  | 338.34  |
| 3N                                         | 3  | 284.3093 | 4.70899        | 2.71874    | 272.6115                    | 296.0071    | 279.04  | 288.10  |
| 4N                                         | 3  | 262.6752 | 4.54020        | 2.62128    | 251.3967                    | 273.9537    | 259.77  | 267.91  |
| 5N                                         | 3  | 214.9502 | 10.54634       | 6.08893    | 188.7516                    | 241.1487    | 205.18  | 226.13  |
| Total                                      | 11 | 267.9233 | 41.96166       | 12.65192   | 239.7331                    | 296.1135    | 205.18  | 338.34  |

**Table S3.** ANOVA for the co-digestion BMP tests and for the duration of 1 HRT (30 days). Methane potential is expressed as mLCH<sub>4</sub> g<sup>-1</sup> VS added.

| mLCH <sub>4</sub> g <sup>-1</sup> VS added |                |    |             |        |       |
|--------------------------------------------|----------------|----|-------------|--------|-------|
| Source of variation                        | Sum of Squares | df | Mean Square | F      | Sig.  |
| Between Groups                             | 17,182.401     | 3  | 5727.467    | 94.244 | 0.000 |
| Within Groups                              | 425.407        | 7  | 60.772      | -      | -     |
| Total                                      | 17,607.808     | 10 | -           | -      | -     |

**Table S4.** Multiple comparisons for the co-digestion BMP tests and for the duration of 1 HRT (30 days). Methane potential is expressed as mLCH<sub>4</sub> g<sup>-1</sup> VS added.

| Dependent Variable mLCH <sub>4</sub> g <sup>-1</sup> VS added |                     |                       |            |       |                         |             |
|---------------------------------------------------------------|---------------------|-----------------------|------------|-------|-------------------------|-------------|
| LSD                                                           |                     |                       |            |       |                         |             |
| (I) Batch_increased                                           | (J) Batch_increased | Mean Difference (I-J) | Std. Error | Sig.  | 95% Confidence Interval |             |
|                                                               |                     |                       |            |       | Lower Bound             | Upper Bound |
| 2N                                                            | 3N                  | 46.36671*             | 7.11644    | 0.000 | 29.5390                 | 63.1944     |
|                                                               | 4N                  | 68.00081*             | 7.11644    | 0.000 | 51.1731                 | 84.8285     |
|                                                               | 5N                  | 115.72586*            | 7.11644    | 0.000 | 98.8982                 | 132.5536    |
| 3N                                                            | 2N                  | -46.36671*            | 7.11644    | 0.000 | -63.1944                | -29.5390    |
|                                                               | 4N                  | 21.63410*             | 6.36514    | 0.011 | 6.5829                  | 36.6853     |
|                                                               | 5N                  | 69.35915*             | 6.36514    | 0.000 | 54.3080                 | 84.4103     |
| 4N                                                            | 2N                  | -68.00081*            | 7.11644    | 0.000 | -84.8285                | -51.1731    |
|                                                               | 3N                  | -21.63410*            | 6.36514    | 0.011 | -36.6853                | -6.5829     |
|                                                               | 5N                  | 47.72505*             | 6.36514    | 0.000 | 32.6739                 | 62.7762     |
| 5N                                                            | 2N                  | -115.72586*           | 7.11644    | 0.000 | -132.5536               | -98.8982    |
|                                                               | 3N                  | -69.35915*            | 6.36514    | 0.000 | -84.4103                | -54.3080    |
|                                                               | 4N                  | -47.72505*            | 6.36514    | 0.000 | -62.7762                | -32.6739    |

\*. The mean difference is significant at the 0.05 level.

**Table S5.** Descriptive statistics for the co-digestion BMP tests and for the duration of 60 days. Methane potential is expressed as mLCH<sub>4</sub> g<sup>-1</sup> VS added.

| mLCH <sub>4</sub> g <sup>-1</sup> VS added |    |          |                |            |                             |             |         |         |
|--------------------------------------------|----|----------|----------------|------------|-----------------------------|-------------|---------|---------|
| Treatment                                  | N  | Mean     | Std. Deviation | Std. Error | 95% Confidence Interval for |             | Minimum | Maximum |
|                                            |    |          |                |            | Mean                        |             |         |         |
|                                            |    |          |                |            | Lower Bound                 | Upper Bound |         |         |
| 2N                                         | 2  | 367.4087 | 15.57280       | 11.01163   | 227.4927                    | 507.3248    | 356.40  | 378.42  |
| 3N                                         | 3  | 311.3081 | 2.65235        | 1.53133    | 304.7193                    | 317.8969    | 308.25  | 312.99  |
| 4N                                         | 3  | 297.3943 | 4.77437        | 2.75649    | 285.5341                    | 309.2545    | 292.46  | 302.00  |
| 5N                                         | 3  | 277.8593 | 20.87219       | 12.05056   | 226.0099                    | 329.7087    | 258.07  | 299.66  |
| Total                                      | 11 | 308.5911 | 33.65128       | 10.14624   | 285.9839                    | 331.1984    | 258.07  | 378.42  |

**Table S6.** ANOVA for the co-digestion BMP tests and for the duration of 60 days. Methane potential is expressed as mLCH<sub>4</sub> g<sup>-1</sup> VS added.

| mLCH <sub>4</sub> g <sup>-1</sup> VS added |                |    |             |        |       |
|--------------------------------------------|----------------|----|-------------|--------|-------|
| Source of variation                        | Sum of Squares | df | Mean Square | F      | Sig.  |
| Between Groups                             | 10,150.618     | 3  | 3383.539    | 20.184 | 0.001 |
| Within Groups                              | 1173.468       | 7  | 167.638     | -      | -     |
| Total                                      | 11,324.085     | 10 | -           | -      | -     |

**Table S7.** Multiple comparisons for the co-digestion BMP tests and for the duration of 60 days. Methane potential is expressed as mLCH<sub>4</sub> g<sup>-1</sup> VS added.

| Dependent Variable: LCH <sub>4</sub> /g VS added |                     |                       |            |       |                                     |             |
|--------------------------------------------------|---------------------|-----------------------|------------|-------|-------------------------------------|-------------|
| LSD                                              |                     |                       |            |       |                                     |             |
| (I) Batch_increased                              | (J) Batch_increased | Mean Difference (I-J) | Std. Error | Sig.  | 95% Confidence Interval Lower Bound | Upper Bound |
| 2N                                               | 3N                  | 56.10063*             | 11.81941   | 0.002 | 28.1522                             | 84.0491     |
|                                                  | 4N                  | 70.01448*             | 11.81941   | 0.001 | 42.0660                             | 97.9629     |
|                                                  | 5N                  | 89.54946*             | 11.81941   | 0.000 | 61.6010                             | 117.4979    |
| 3N                                               | 2N                  | -56.10063*            | 11.81941   | 0.002 | -84.0491                            | -28.1522    |
|                                                  | 4N                  | 13.91384              | 10.57161   | 0.230 | -11.0840                            | 38.9117     |
|                                                  | 5N                  | 33.44883*             | 10.57161   | 0.016 | 8.4510                              | 58.4467     |
| 4N                                               | 2N                  | -70.01448*            | 11.81941   | 0.001 | -97.9629                            | -42.0660    |
|                                                  | 3N                  | -13.91384             | 10.57161   | 0.230 | -38.9117                            | 11.0840     |
|                                                  | 5N                  | 19.53498              | 10.57161   | 0.107 | -5.4629                             | 44.5329     |
| 5N                                               | 2N                  | -89.54946*            | 11.81941   | 0.000 | -117.4979                           | -61.6010    |
|                                                  | 3N                  | -33.44883*            | 10.57161   | 0.016 | -58.4467                            | -8.4510     |
|                                                  | 4N                  | -19.53498             | 10.57161   | 0.107 | -44.5329                            | 5.4629      |

\*. The mean difference is significant at the 0.05 level.

**Table S8.** Additional characteristics of the inoculum.

| Sample   | FOS mg L <sup>-1</sup> | TAC mg L <sup>-1</sup> | FOS/TAC | P <sub>2</sub> O <sub>5</sub> mg L <sup>-1</sup> |
|----------|------------------------|------------------------|---------|--------------------------------------------------|
| Inoculum | 4524                   | 19371                  | 0.234   | 1751                                             |
